# Supplementary material for: Kaempferia parviflora Rhizome Extract Inhibits Glutamate-Induced Toxicity in HT-22 Mouse Hippocampal Neuronal Cells and Extends Longevity in Caenorhabditis elegans
Source: MDPI journal article supplement (doi:10.3390/biology10040264), 2021-03-26
Supplement: s1 [file s1]

## Supplementary materials

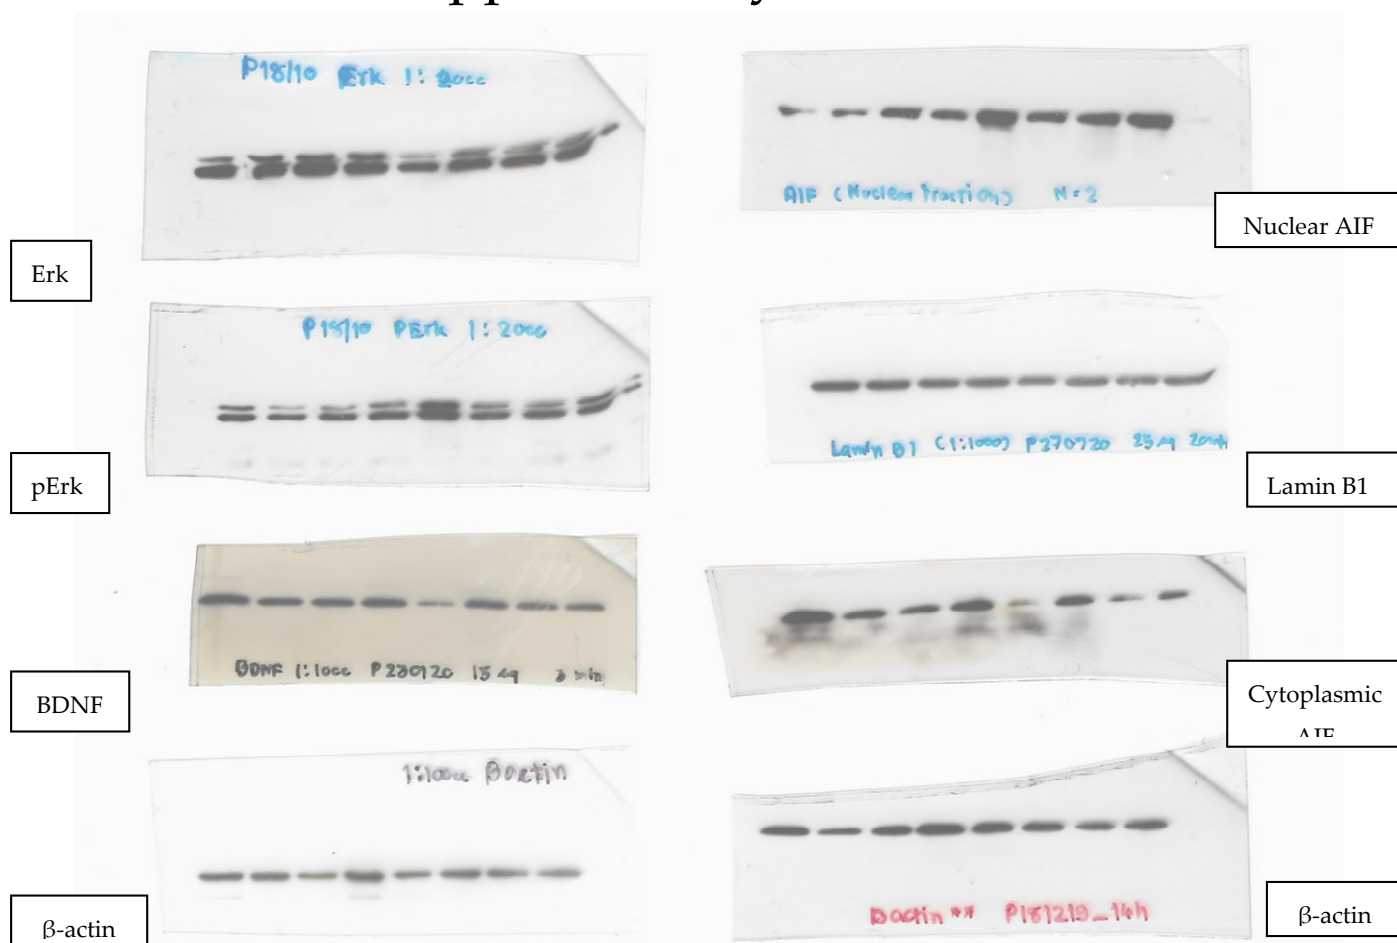

**Figure S1:** The film Western blot images represent the expression level of Erk, pErk, BDNF, β-actin (**Figure 4 of revised manuscript**) and nuclear AIF, Lamin B1, cytoplasmic AIF, β-actin (**Figure 5 of revised manuscript**).

In our present study, the content of 5,7-dimethoxyflavone (5,7-DMF) in *K. parviflora* rhizome extract was determined using the high-performance liquid chromatography (HPLC) analysis. The chromatogram showed the concentration of 5,7-DMF in KP extract (100 mg/mL) was  $10037.32 \pm 17.991$  mg/L ( $10.04 \pm 0.017$  mg/mL) as shown in Figure S2. Therefore, the detection of 5,7-DMF in our KP extract as a major phytochemical certified the quality of our extract for this study. This finding was in line with other study since it has been known for a long time that 5,7-DMF is a major chemical constituent in KP rhizome extract.

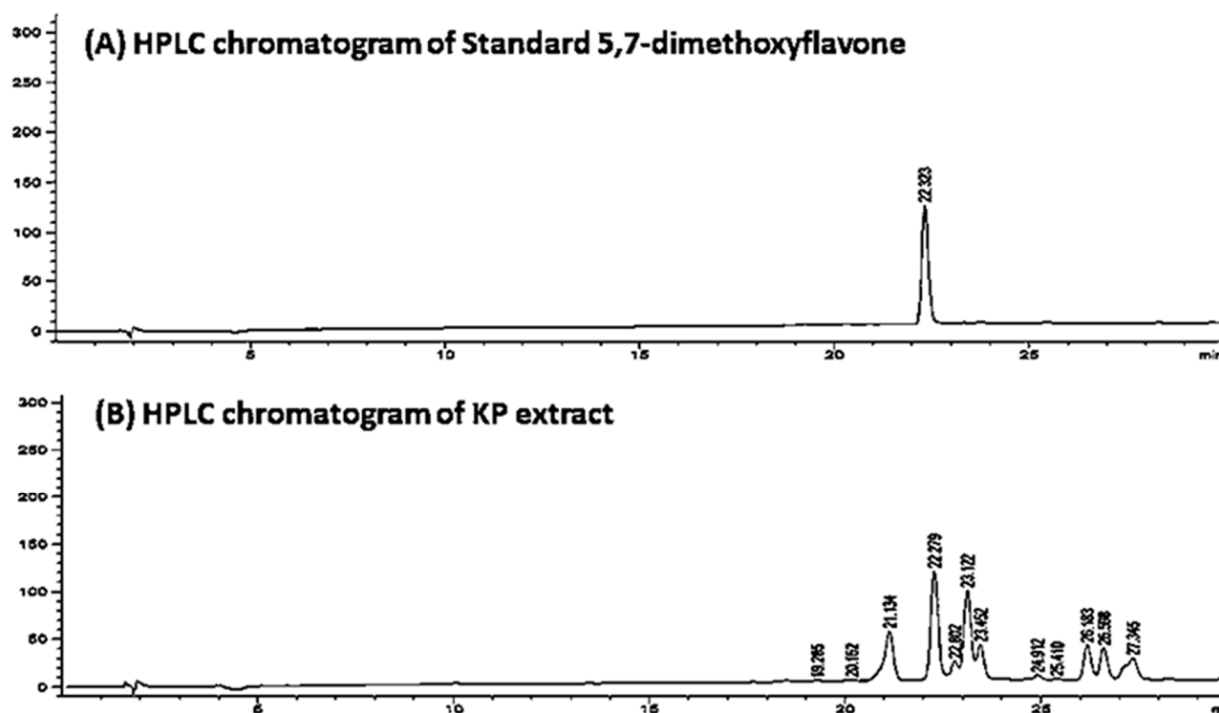

**Figure S2:** Identification and quantification of 5,7-DMF in KP extract by HPLC analysis. (a) Standard 5,7-DMF and (b) KP extract. Column nucleodure 100-5 C18ec (4.6 mm × 150 mm I.D., 5 µm); mobile phase methanol : 2% acetic acid in water, gradient elution; flow rate: 1 mL/min; injected sample 20 µL; detector : diode array detector at 280 nm.

This study was first in terms of testing the effect of KP extract on glutamate toxicity in HT-22 cells. Our preliminary study was designed to determine effects of pretreatment (the HT-22 cells were treated with KP extract for 12 h and then exposed to glutamate for 12 h) and co-treatment (HT-22 cells were simultaneously exposed to glutamate and treated with KP extract for 24 h). Results from the MTT assay showed that pre-treatment of cells for 12 h with different concentrations of KP extract did not lead to any significant protection, while in the co-treatment studies suggested a protective effect of the KP extract against cytotoxicity caused by glutamate (5mM). However, the HT-22 cells were stressed with 5 mM glutamate for 24 h resulting in a reduction of cell viability less than 50% which inappropriate for subsequent experiments. Therefore in this study the HT-22 cells were exposed to glutamate and treated with KP extract for 14 h.

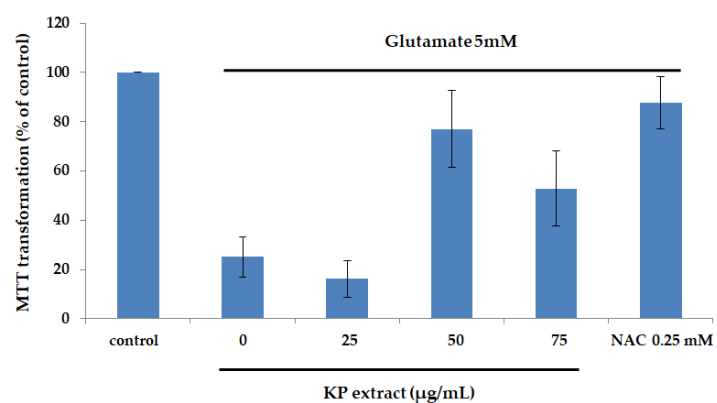

(a)

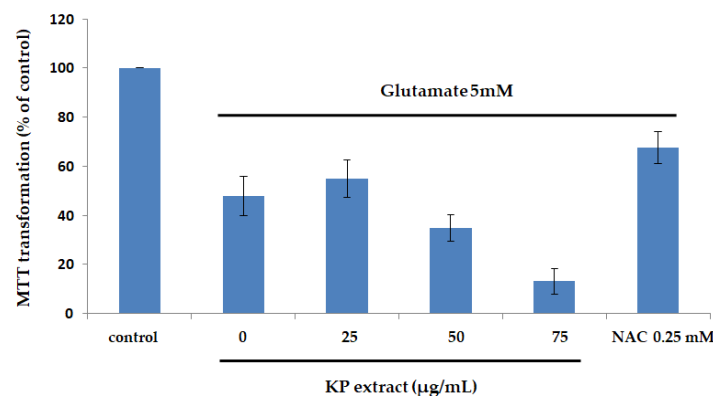

(b)

**Figure S3:** Neuroprotective effect of KP extract on glutamate-induced cytotoxicity in HT-22 cells. (a) Cells were exposed to 5 mM glutamate alone or glutamate in combination with different concentrations of KP extract for 24 h. (b) Cells were pretreated with various concentration of KP extract for 12 h and then exposed to 5 mM glutamate for 12 h. NAC (0.25 mM) was used as positive control. Cell viability was determined by MTT assay. Each bar represents the mean  $\pm$  SEM from 2 independent experiments per group.

The N2 wild-type *C. elegans* cultured on various concentrations of KP extracts (100, 300, 500, 700 and 900 µg/mL) were monitored to determine whether KP extract effect on the lifespan of *C. elegans*. Our result revealed that the control group without KP extract had a mean life span of  $13.86 \pm 0.58$  days. There were no statistically significant different in the life span of *C. elegans* control group and those exposed to KP extract at lower concentration (100 and 300 µg/mL). But *C. elegans* treated with KP extract at 500 and 700 µg/mL were significantly extended the mean of life span to  $17.24 \pm 0.55$  ( $p < 0.001$ ) and  $16.28 \pm 0.42$  days ( $p < 0.05$ ), respectively (Table 3 and Figure 9).

**Table S1:** Results and statistical analysis of KP extract treated *C. elegans* lifespan assay.

| Treatment    | No. of worms | Mean lifespan (days) | Percentage of increased mean lifespan (vs. control) | P value vs. control |
|--------------|--------------|----------------------|-----------------------------------------------------|---------------------|
| Control      | 50           | $13.86 \pm 0.58$     | -                                                   | -                   |
| KP 100 µg/mL | 50           | $14.42 \pm 0.37$     | 4.04                                                | 0.984               |
| KP 300 µg/mL | 50           | $15.14 \pm 0.42$     | 9.24                                                | 0.553               |
| KP 500 µg/mL | 50           | $17.24 \pm 0.55$     | 24.39                                               | 0.001               |
| KP 700 µg/mL | 50           | $16.28 \pm 0.42$     | 17.46                                               | 0.028               |
| KP 900 µg/mL | 50           | $14.02 \pm 0.43$     | 1.15                                                | 1.000               |

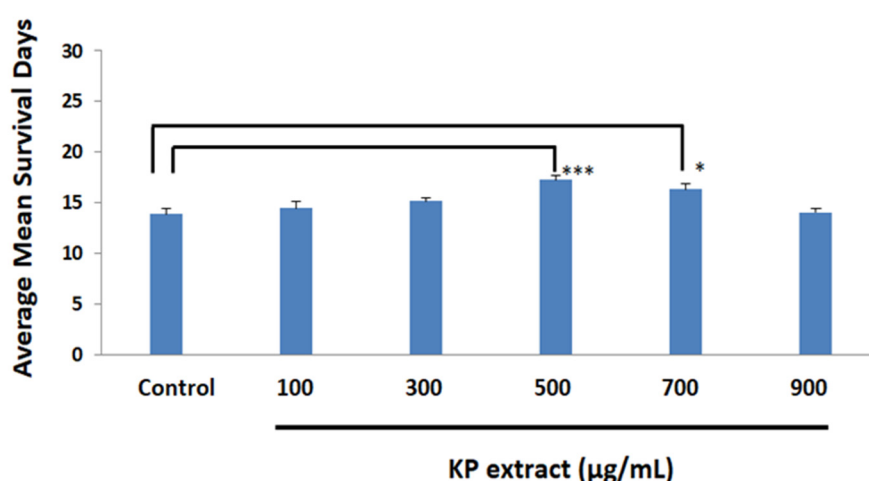

**Figure S4:** Effect of KP extract on the lifespan of N2 wild-type *C. elegans*. The L4 larval stages nematodes were treated at 15 °C with various concentration of KP extracts (0, 100, 300, 500, 700 and 900 µg/mL). The survival was counted starting from day 1 of adulthood to death. The bars represent the mean lifespan when treated with KP extract. The experiments were performed in 5 experiment trials. and shown as the mean ± SEM, \* $P < 0.05$  and \*\*\* $P < 0.001$  vs. control group.
